# Supplementary material for: Symptom Burden and Blood Counts in Patients With Polycythemia Vera in the United States: An Analysis From the REVEAL Study
Source: PubMed Central journal article supplement — Clin Lymphoma Myeloma Leuk. Author manuscript; Available in PMC 2021 May 25. (PMC8148986; doi:10.1016/j.clml.2019.06.001), 2019-06-13
Supplement: NIHMS1698042-supplement-1.pdf [file NIHMS1698042-supplement-1.pdf]

Supplemental Data

**Supplemental Figure 1** Symptom Severity According to Degree of Blood Count Control. Symptom Severity (Severe, Moderate, Mild, None) Percentages for (A) Night Sweats, (B) Abdominal Discomfort, (C) Bone Pain, (D) Weight Loss, and (E) Fever Are Listed for Patients According to Blood Count Control Status. Groups on the Basis of Degree of Blood Count Control (ie,  $\geq 1$ ,  $\geq 2$ , CHR) Are Not Mutually Exclusive

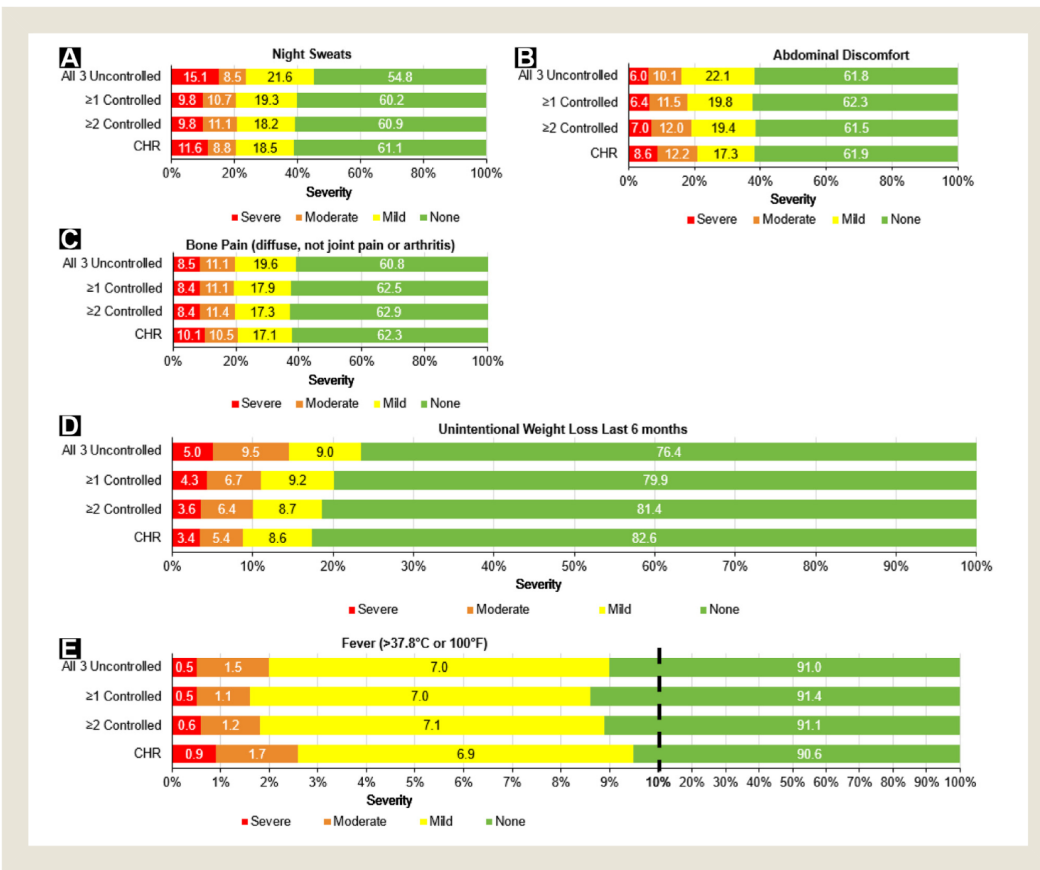

Abbreviation: CHR = complete hematologic remission.
